# Supplementary material for: The Advancement in Membrane Bioreactor (MBR) Technology toward Sustainable Industrial Wastewater Management
Source: MDPI journal article supplement (doi:10.3390/membranes13020181), 2023-02-02
Supplement: s1 [file s1]

*Supplementary Materials*

# The Advancement in Membrane Bioreactor (MBR) Technology toward Sustainable Industrial Wastewater Management

Tanzim Ur Rahman <sup>1</sup>, Hridoy Roy <sup>1</sup>, Md. Reazul Islam <sup>1,2</sup>, Mohammed Tahmid <sup>1</sup>, Athkia Fariha <sup>1</sup>, Antara Mazumder <sup>1,3</sup>, Nishat Tasnim <sup>1</sup>, Md. Nahid Pervez <sup>4</sup>, Yingjie Cai <sup>5</sup>, Vincenzo Naddeo <sup>4,\*</sup> and Md. Shahinoor Islam <sup>1,6,\*</sup>

<sup>1</sup> Department of Chemical Engineering, Bangladesh University of Engineering and Technology, Dhaka 1000, Bangladesh

<sup>2</sup> Department of Civil Engineering, Louisiana Tech University, Ruston, LA 71270, USA

<sup>3</sup> Department of Chemical Engineering, Auburn University, Alabama, USA<sup>4</sup> Sanitary Environmental Engineering Division (SEED), Department of Civil Engineering, University of Salerno, via Giovanni Paolo II 132, 84084 Fisciano, SA, Italy

<sup>5</sup> Hubei Provincial Engineering Laboratory for Clean Production and High Value Utilization of Bio-Based Textile Materials, Wuhan Textile University, Wuhan 430200, China

<sup>6</sup> Department of Textile Engineering, Daffodil International University, Dhaka 1341, Bangladesh

\* Correspondence: vnaddeo@unisa.it (V.N.); shahinoorislam@che.buet.ac.bd (M.S.I.)

**Table S1.** Different MBR technology supplier, their based country and types of MBR products.

| MBR Technology Supplier                            | Based in              | MBR Products and Systems                                                                                                                                                                                   |
|----------------------------------------------------|-----------------------|------------------------------------------------------------------------------------------------------------------------------------------------------------------------------------------------------------|
| SUEZ—Water Technologies & Solutions                | Trevose, PA USA       | <ul style="list-style-type: none"> <li>• ZeeWeed 500</li> <li>• LEAPmbr</li> <li>• LEAPprimary</li> </ul>                                                                                                  |
| KUBOTA Corporation                                 | Osaka, Japan          | <ul style="list-style-type: none"> <li>• SP Series</li> <li>• RM/RW Series</li> <li>• FS/FK Series</li> </ul>                                                                                              |
| Memstar                                            | Conroe, TX, USA       | <ul style="list-style-type: none"> <li>• Submerged MBR modules (SMM-1015T, SMM-1522T, and SMM-2030T)</li> <li>• Submerged MBR skids capable of treating up to 300 gpm (1,625 m<sup>3</sup>/day)</li> </ul> |
| ECONITY Co., Ltd.                                  | California, USA       | <ul style="list-style-type: none"> <li>• CF Series, C-Type</li> <li>• CF Series, E-Type</li> </ul>                                                                                                         |
| Beijing Origin Water Technology Co., Ltd. (BOW)    | Beijing, China        | <ul style="list-style-type: none"> <li>• Membrane Bio-Reactor Unit (MBRU)</li> </ul>                                                                                                                       |
| Mitsubishi Chemical Aqua Solutions Co., Ltd.       | Tokyo, Japan          | <ul style="list-style-type: none"> <li>• Sterapore</li> </ul>                                                                                                                                              |
| Europe Membrane                                    | Paterna, Spain        | <ul style="list-style-type: none"> <li>• MBRable</li> <li>• MBRable Train</li> <li>• MBRable Pack</li> </ul>                                                                                               |
| BioMicrobics, Inc.                                 | Kansas, USA           | <ul style="list-style-type: none"> <li>• BioBarrier® HSMBR®</li> <li>• BioBarrier® MBR</li> <li>• BioBarrier® GWMBR™</li> <li>• BioBarrier® MarineMBR™</li> </ul>                                          |
| MEMCON (Pty) Ltd.                                  | Gauteng, South Africa | <ul style="list-style-type: none"> <li>• Bio-Cel® Flat Sheet Membrane</li> </ul>                                                                                                                           |
| Shanghai Sperta Environmental Technology Co., Ltd. | Shanghai, China       | <ul style="list-style-type: none"> <li>• SPERTA MBR Membrane Element</li> <li>• SPERTA MBR Membrane Module</li> <li>• SPERTA MBR Membrane System</li> </ul>                                                |
